# Supplementary material for: Outcomes of extracranial stereotactic body radiation therapy for induced oligometastatic non-small cell lung cancer on novel systemic therapy
Source: PubMed Central journal article supplement — Transl Lung Cancer Res. 2024 Mar 22;13(3):465–74. doi: 10.21037/tlcr-23-802 (PMC11002507; doi:10.21037/tlcr-23-802), 2024-03-22
Supplement: tlcr-13-03-465-dss.pdf [file tlcr-13-03-465-dss.pdf]

## Data Sharing Statement

|                     |                                                                                                                                                     |                                                            |
|---------------------|-----------------------------------------------------------------------------------------------------------------------------------------------------|------------------------------------------------------------|
| <b>Article Info</b> | <a href="https://dx.doi.org/10.21037/tlcr-23-802">https://dx.doi.org/10.21037/tlcr-23-802</a>                                                       |                                                            |
| <b>Item</b>         | <b>Question</b>                                                                                                                                     | <b>Authors' Response<br/>(place "-" if not applicable)</b> |
| 1                   | Would you like to share data collected for your study to others?                                                                                    | Yes.                                                       |
| 2                   | If not, would you like to share the reason for your decision?                                                                                       | -                                                          |
| 3                   | What data in particular will be shared?                                                                                                             | Any data requested.                                        |
| 4                   | Any other documents will be shared? Such as study protocol, statistical analysis plan, informed consent form, clinical study report, analytic code. | Statistical analysis plan.                                 |
| 5                   | When will data availability begin?                                                                                                                  | After publication.                                         |
| 6                   | When will data availability end?                                                                                                                    | 5 years post publication.                                  |
| 7                   | To whom will you share the data?                                                                                                                    | Any institution requesting who is interested in our data.  |
| 8                   | For what type of analysis or purpose?                                                                                                               | Combined analysis with other institutions.                 |
| 9                   | How or where can the data/documents be obtained?                                                                                                    | Via corresponding author.                                  |
| 10                  | Any other restrictions?                                                                                                                             | None.                                                      |
